# Supplementary material for: A Novel Two-Lipid Signature Is a Strong and Independent Prognostic Factor in Ovarian Cancer
Source: MDPI journal article supplement (doi:10.3390/cancers13081764), 2021-04-07
Supplement: s1 [file s1]

## SUPPLEMENTARY DATA

### Salminen et al., A novel two-lipid signature is a strong and independent prognostic factor in ovarian cancer

**Supplementary Table S1.** Characteristics of the Turku longitudinal patient cohort.

| Patient | Stage | Treatment Strategy | Residual Disease | Treatment Response | Progression-free survival (months) | Overall Survival (months) |
|---------|-------|--------------------|------------------|--------------------|------------------------------------|---------------------------|
| 1       | IIIC  | PDS                | 0-1cm            | CR                 | 27.2                               | 51.3                      |
| 2       | IIIC  | NACT               | 0cm              | CR                 | 2.7                                | 31.4                      |
| 3       | IVA   | NACT               | 0-1cm            | CR                 | 19.3                               | 49.7                      |
| 4       | IIIC  | NACT               | >1cm             | CR                 | 3                                  | 12                        |
| 5       | IIIC  | NACT               |                  | PD after NACT      | 0                                  | 14.7                      |
| 6       | IVB   | NACT               | >1cm             | PD                 | 0                                  | 18.4                      |
| 7       | IIIB  | PDS                | 0cm              | CR                 | 19.6                               | 47.7                      |
| 8       | IIIC  | PDS                | >1cm             | PD                 | 0                                  | 7.7                       |
| 9       | IIIC  | NACT               |                  | PD after NACT      | 0                                  | 19.4                      |
| 10      | IVB   | PDS                | >1cm             | CR                 | 20.1                               | 46.6                      |
| 11      | IVB   | PDS                | 0-1cm            | PR                 | 3                                  | 36.2                      |
| 12      | IIIC  | NACT               | 0-1cm            | CR                 | 3                                  | 37.1                      |
| 13      | IIIC  | NACT               | 0cm              | PD                 | 0                                  | 17.6                      |
| 14      | IVB   | NACT               | 0-1cm            | PD                 | 0                                  | 10.9                      |
| 15      | IIIC  | PDS                | 0-1cm            | CR                 | 19.6                               | 72.9                      |
| 16      | IIIC  | NACT               | 0-1cm            | CR                 | 4.5                                | 12                        |
| 17      | IIIC  | NACT               |                  | PD after NACT      | 0                                  | 12                        |
| 18      | IIIC  | PDS                | 0-1cm            | CR                 | 27.7                               | 69.2                      |
| 19      | IIIC  | NACT               | 0-1cm            | PR                 | 18.1                               | 43.9                      |
| 20      | IIIC  | NACT               | 0-1cm            | CR                 | 5.8                                | 28.2                      |

NACT=neoadjuvant chemotherapy, PDS=primary debulking surgery, PD=progressive disease, CR=complete response, PR=partial response

**Supplementary Table S3.** Prognostic performance of HE4 in the Turku cohort.

|                    | (Sub)group               | Ev+ | Ev- | HR (95% CI) <sup>a</sup> | C-statistic <sup>a</sup> | HR (95% CI) <sup>b</sup> | C-statistic <sup>b</sup> |
|--------------------|--------------------------|-----|-----|--------------------------|--------------------------|--------------------------|--------------------------|
| <b>Death</b>       | <b>All</b>               | 41  | 69  | 1.12 (0.76, 1.66)        | 0.561                    | 0.72 (0.46, 1.13)        | 0.702                    |
|                    | <b>No residual tumor</b> | 13  | 42  | 1.20 (0.59, 2.44)        | 0.529                    | 0.49 (0.19, 1.26)        | 0.674                    |
| <b>Progression</b> | <b>All</b>               | 65  | 45  | 1.20 (0.86, 1.68)        | 0.593                    | 0.94 (0.65, 1.37)        | 0.698                    |
|                    | <b>No residual tumor</b> | 22  | 33  | 2.07 (1.17, 3.65)        | 0.659                    | 1.75 (0.86, 3.58)        | 0.832                    |

Hazard ratios are expressed per increase in standard deviation. Ev+, event; ev-, no event.

<sup>a</sup>Unadjusted models.

<sup>b</sup>Adjusted with age and stage.

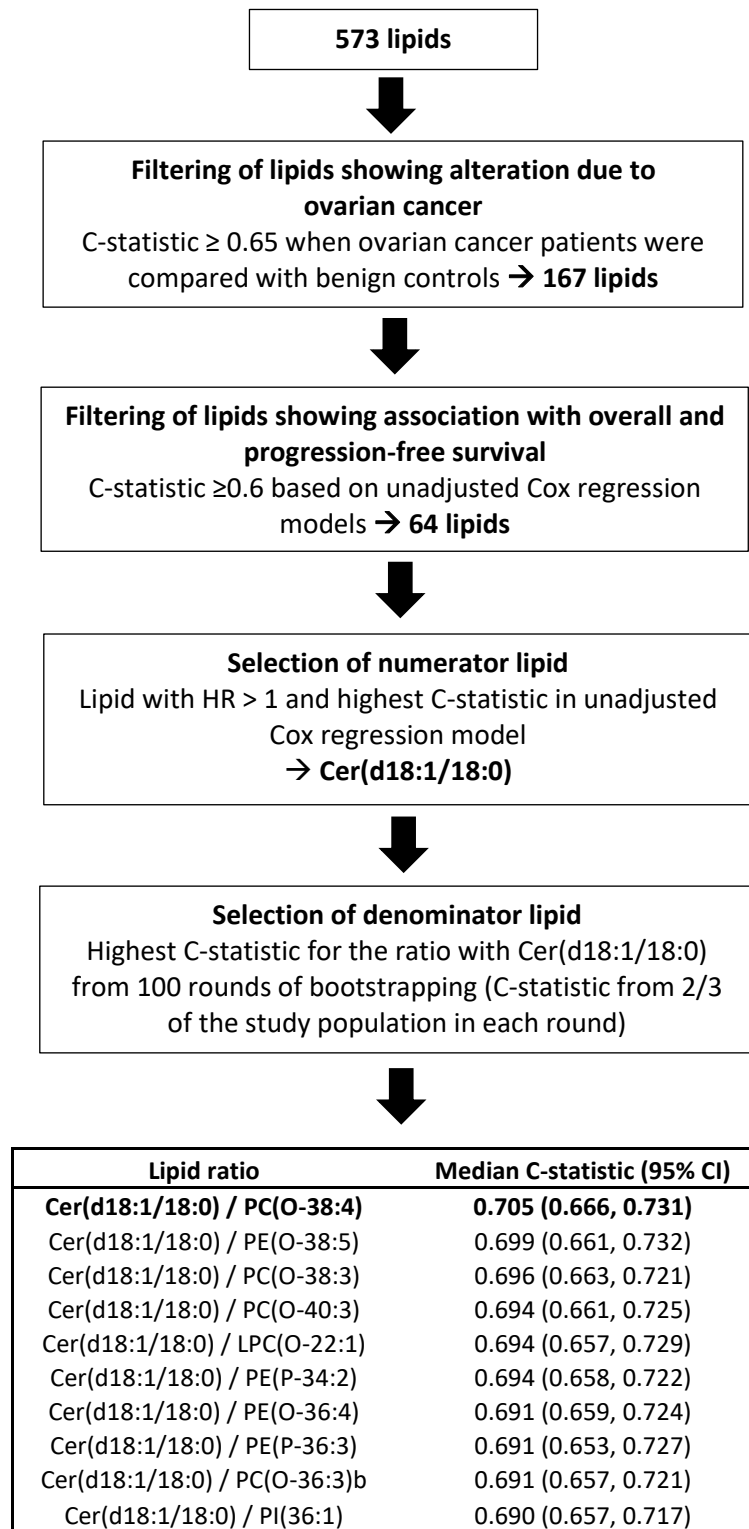

**Supplementary Figure S1.** Selection of the prognostic lipid ratio. First, only ovarian cancer-associated lipids were left for the analyses, whereafter only those were included in the selection that showed association both with overall and progression-free survival. There was only one lipid showing  $HR > 1$ , i.e. Cer(d18:1/18:0), which was selected as the numerator lipid. Finally, denominator lipid was selected by calculating C-statistic for all the lipids in ratio with the selected numerator lipid. The highest C-statistic was observed for the Cer(d18:1/18:0) / PC(O-38:4) ratio (in the table 10 lipid ratios with the highest C-statistic are shown).

| Stage                | Residual tumor | PROGRESSION (1 YEAR) |    |    | DEATH (5 YEARS) |    |    |
|----------------------|----------------|----------------------|----|----|-----------------|----|----|
| III-IV               | > 10 mm        | 21                   | 30 | 39 | 46              | 75 | 87 |
|                      | 0 - 10 mm      | 21                   | 29 | 38 | 38              | 66 | 79 |
|                      | 0 mm           | 20                   | 29 | 37 | 31              | 57 | 71 |
| I-II                 | All            | 3                    | 4  | 6  | 12              | 21 | 33 |
| Lipid ratio quartile |                | Q1-Q2                | Q3 | Q4 | Q1-Q2           | Q3 | Q4 |

**Supplementary Figure S2.** Risk (%) of progression in 1 year or death in 5 years, based on the lipid ratio quartile, stage and success of tumor removal in surgery in the Turku cohort HGSOC patients.

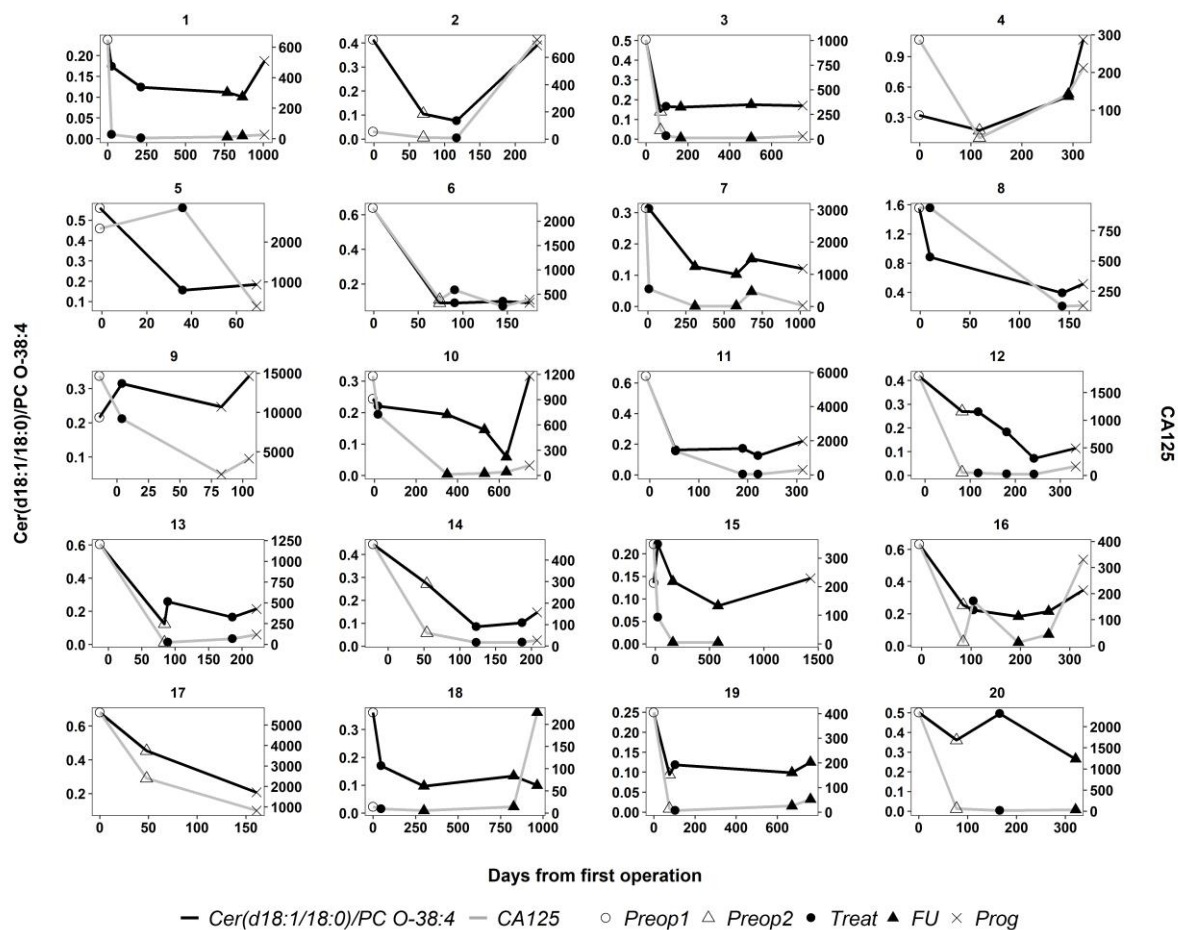

**Supplementary Figure S3.** Longitudinal analysis of the two-lipid signature and CA-125 in 20 ovarian cancer patients. Patients 18, 19 and 20 did not have samples obtained at progression.
